# Supplementary material for: Role of Cytokine Combinations on CD4+ T Cell Differentiation, Partial Polarization, and Plasticity: Continuous Network Modeling Approach
Source: Front Physiol. 2018 Aug 2;9:877. doi: 10.3389/fphys.2018.00877 (PMC6089340; doi:10.3389/fphys.2018.00877)
Supplement: DATA SHEET S2 — Boolean rules of the CD4+ T cell regulatory network. [file Data_Sheet_2.CSV]

targets	functions
TBET	((IFNG | (IL12e & !IL21 & !IL4 & !IL10) ) | TBET) & !IL4 & !GATA3 & !IL21 & !BCL6
IFNG	(IFNGe | ((IFNG | TBET) & !GATA3 & !TGFB)) & !IL21 & !IL4 & !IL10 & !BCL6 & !IL9
GATA3	((IL2 & IL4) | IL4 | GATA3) & !TBET & !TGFB & !IL21 & !IFNG & !BCL6
IL2	(IL2e | (IL2 & !FOXP3)) & !IFNG & !IL21 & (FOXP3 | !IL10)
IL4	(IL4e | (GATA3 & (IL2 | IL4) & !TBET)) & !IFNG & !IL21
RORGT	IL21 & TGFB & !TBET & !FOXP3 & !GATA3 & !BCL6
IL21	(IL6e | IL21e | IL21 | RORGT | BCL6) & !IFNG & !IL4 & !IL10 & !IL2 & !IL9
FOXP3	IL2 & (TGFB | FOXP3) & !IL21 & !RORGT & !IL4
TGFB	(TGFBe | ((TGFB | FOXP3) & !IL21 ))
IL10	(IL10e | (IL10 & (IFNG | IL21 | TGFB | GATA3 | IL27e)))
IL9	IL4 & ((IL10 & IL2) | TGFB) & !IFNG & !IL21 & !FOXP3
BCL6	(IL21 | IFNG) & !TBET & !IL2 & !TGFB
IL12e	IL12e
IFNGe	IFNGe
IL2e	IL2e
IL4e	IL4e
IL6e	IL6e
IL21e	IL21e
TGFBe	TGFBe
IL10e	IL10e
IL27e	IL27e
