# Supplementary material for: Role of Cytokine Combinations on CD4+ T Cell Differentiation, Partial Polarization, and Plasticity: Continuous Network Modeling Approach
Source: Front Physiol. 2018 Aug 2;9:877. doi: 10.3389/fphys.2018.00877 (PMC6089340; doi:10.3389/fphys.2018.00877)
Supplement: DATA SHEET S6 — Continuous attractors of the CD4+ T cell regulatory network. [file Data_Sheet_6.CSV]

Label	TBET	IFNG	GATA3	IL2	IL4	RORGT	IL21	FOXP3	TGFB	IL10	IL9	BCL6	IL12e	IFNGe	IL2e	IL4e	IL6e	IL21e	TGFBe	IL10e	IL27e	difference
GATA3+	4.53877896703189E-05	4.53877896698041E-05	0.9999543643	4.54289311723636E-05	4.54701493280588E-05	4.53877859023366E-05	4.55113977872771E-05	4.53877896785774E-05	4.54701233406403E-05	4.54289368415855E-05	4.53877877898506E-05	4.54701533710853E-05	0	0	0	0	0	0	0	0	0	0.0005453543
Tfh	4.53927505686575E-05	4.53927505686577E-05	4.53927505686574E-05	4.53927524538463E-05	4.53927505686582E-05	4.53927524489041E-05	0.9999544015	4.53927505686582E-05	4.53927543416426E-05	4.54339177339592E-05	4.53927505685723E-05	0.9999544425	0	0	0	0	0	0	0	0	0	0.0005451247
Th0	4.54651935301665E-05	4.5465182132695E-05	4.54651170098637E-05	0.000045424	4.5382829720307E-05	4.53828278348373E-05	4.55063878138837E-05	4.53828297237212E-05	4.54651300744775E-05	4.53828334878967E-05	4.53828278355391E-05	4.54652346048845E-05	0	0	0	0	0	0	0	0	0	0.0005451703
Th0	4.54701825110134E-05	4.5470171064413E-05	4.55113914859256E-05	0.9999544061	0.000045429	4.53877834275268E-05	4.53877871884851E-05	4.54701825166264E-05	4.54701937063556E-05	4.53877889053215E-05	4.53877852885304E-05	4.53877853115615E-05	0	0	0	0	0	0	0	0	0	0.0005453539
Th1	0.9999544427	0.9999543187	4.53927416385771E-05	4.53927435299635E-05	4.53927416384067E-05	4.53927416384929E-05	4.53927472983297E-05	4.53927453865702E-05	4.54751114167965E-05	4.54339086785765E-05	4.53927416384929E-05	0.000045434	0	0	0	0	0	0	0	0	0	0.0005453308
Th17	4.53976840220522E-05	4.53976802538035E-05	4.53976802538032E-05	4.53976821430253E-05	4.53976802538043E-05	0.9999543545	0.999954396	4.53976802537199E-05	0.9999546023	4.54388647191823E-05	4.53976821430251E-05	4.54388216853988E-05	0	0	0	0	0	0	1	0	0	0.0005453086
Th1R	0.9999544008	4.54339111571856E-05	4.53927590354283E-05	4.53927590314288E-05	4.53927552690097E-05	4.53927552689252E-05	4.53927608969104E-05	4.53927590414057E-05	4.54751251834369E-05	0.9999545661	4.53927590072868E-05	4.53927590373674E-05	0	0	0	0	0	0	0	0	1	0.0005450842
Th1R	0.9999544013	4.54338690024695E-05	4.53927541760765E-05	4.53927541680452E-05	4.53927504714643E-05	4.53927504700779E-05	4.53927559846252E-05	4.53927541490956E-05	4.5475120375378E-05	0.9999546072	4.53927541490109E-05	4.53927542397208E-05	0	0	0	0	0	0	0	1	0	0.0005450425
Th1R	0.9999544007	4.54339337029448E-05	4.53927404247416E-05	4.54339017738118E-05	4.53927404247438E-05	4.53927422830759E-05	4.55163258105565E-05	4.54339018146173E-05	0.9999545248	4.54339074528559E-05	4.54338644855355E-05	4.53927404247416E-05	0	0	0	0	0	0	0	0	0	0.0005453313
Th1R	0.9999543959	4.53976819156784E-05	4.53976800425943E-05	4.53976838065626E-05	4.53976800425957E-05	4.53976819284543E-05	4.53976855914906E-05	4.54388195953582E-05	0.99995452	0.9999545198	4.54388195838571E-05	4.53976800425974E-05	0	0	0	0	0	0	0	0	0	0.0005452257
Th1R	0.9999543912	4.54437501162199E-05	4.54025641379826E-05	0.9999545151	4.54025659876372E-05	4.54025641378127E-05	4.54025697754342E-05	0.9999544324	0.9999545563	4.54437613836905E-05	4.54025659914318E-05	4.54025641377264E-05	0	0	1	0	0	0	0	0	0	0.0005454079
Th1R	0.9999543861	4.54073872767077E-05	4.54073854005284E-05	0.9999544689	4.54073872869645E-05	4.54073854003585E-05	4.5407385400528E-05	0.9999544275	0.9999545515	0.9999545101	4.54073872853386E-05	4.54073854002717E-05	0	0	1	0	0	0	0	0	0	0.0005455077
Th1R	0.9999544374	0.9999543965	4.53976757816518E-05	4.53976776680044E-05	4.53976757816518E-05	4.53976776331262E-05	4.53976814323862E-05	4.54388154304831E-05	0.9999545199	4.54388601995399E-05	4.53976776329768E-05	4.53976776586553E-05	0	1	0	0	0	0	0	0	0	0.0005453077
Th2	4.53927405620146E-05	4.53927405620148E-05	0.9999544009	4.5433901934893E-05	0.9999544008	4.5392740561277E-05	4.53927462225557E-05	4.5392740562013E-05	4.5475110250911E-05	4.54339076044278E-05	4.54339413135765E-05	0.000045475	0	0	0	0	0	0	0	0	0	0.0005454139
Th2	4.53976685793055E-05	4.53976685793051E-05	0.999954396	0.9999543958	0.9999544375	4.53976685792202E-05	4.539766858007E-05	4.53976723524327E-05	4.54800691388303E-05	4.54388510554759E-05	4.5480093305105E-05	4.53976723520363E-05	0	0	0	0	0	0	0	0	0	0.0005455558
Th2R	4.53927451857861E-05	4.53927414096249E-05	0.9999543597	4.53927451769176E-05	4.54750999452619E-05	4.53927414095413E-05	4.53927470457148E-05	4.53927451889124E-05	4.5475111145098E-05	0.9999545247	4.53927451544659E-05	0.000045475	0	0	0	0	0	0	0	0	0	0.00054529
Th2R	4.53976666649784E-05	4.53976666648053E-05	0.9999543959	4.53976704342603E-05	0.9999543958	4.53976666648903E-05	4.53976666650645E-05	4.53976666649761E-05	4.54800671482803E-05	0.9999545197	4.54800541236984E-05	0.00004548	0	0	0	0	0	0	0	0	0	0.0005455147
Th3	4.54701151663023E-05	4.53877926556823E-05	4.53877926526411E-05	4.54289343054851E-05	4.5387792734109E-05	0.000045429	4.55113635260832E-05	4.5428934390209E-05	0.9999545298	4.54289399451675E-05	4.54288971382929E-05	4.53877926581029E-05	0	0	0	0	0	0	0	0	0	0.0005451475
Th9	4.53976777549235E-05	4.53976740549904E-05	4.5438886465504E-05	4.54388508964716E-05	0.9999545199	4.54388118219056E-05	4.53976740552466E-05	4.53976759107796E-05	0.99995452	4.54388565636254E-05	0.999954396	4.539767781975E-05	0	0	0	1	0	0	0	0	0	0.0005453079
Th9	4.54025694533102E-05	4.54025656857679E-05	4.54437927904981E-05	4.54025694494852E-05	0.999954515	4.54437179830178E-05	4.54025656857679E-05	4.54025675705357E-05	0.999954515	0.9999545149	0.999954391	4.54025694441354E-05	0	0	0	1	0	0	0	0	0	0.0005453669
Th9	4.54025582155406E-05	4.54025544559725E-05	4.54437833040086E-05	0.9999543909	0.9999545152	4.54437067864858E-05	4.54025544559725E-05	4.54437831261182E-05	0.9999545151	4.5443751633922E-05	0.999954391	4.54025544561427E-05	0	0	0	1	0	0	0	0	0	0.0005455731
Tr1	4.54701213592907E-05	4.53877986810848E-05	4.547011927797E-05	4.53877986819694E-05	4.53877986953658E-05	4.53877968082563E-05	4.53878005493907E-05	4.53877986890553E-05	4.54701325589099E-05	0.9999545711	4.5387798697811E-05	4.54700502617439E-05	0	0	0	0	0	0	0	0	1	0.000545024
Tr1	4.54701217867866E-05	4.53877992683361E-05	4.54701201011176E-05	4.53877992158519E-05	4.53877992542054E-05	4.5387797407787E-05	4.53878011408542E-05	4.53877992885302E-05	4.54701331219029E-05	0.9999546122	4.53877992509288E-05	4.54700510482896E-05	0	0	0	0	0	0	0	1	0	0.0005449828
Tr1	4.54751073516165E-05	4.53927487199999E-05	4.53927524740459E-05	4.53927524163647E-05	4.53927524863519E-05	4.54338711475258E-05	4.53927543543974E-05	4.54338728728769E-05	0.9999545248	0.9999545248	4.54338728452719E-05	4.53927524125825E-05	0	0	0	0	0	0	0	0	0	0.0005450836
Treg	4.54800647578193E-05	4.53976791493335E-05	4.53976809521743E-05	0.9999545199	4.54388150030092E-05	4.53976772439309E-05	4.53976810377511E-05	0.9999544375	0.9999545611	4.54388579380979E-05	4.53976772422563E-05	4.53976753918545E-05	0	0	1	0	0	0	0	0	0	0.0005452252
Treg	0.000045485	4.5402560372731E-05	4.54025659859515E-05	0.9999544736	4.54437145192022E-05	4.54025622544176E-05	4.54025603735169E-05	0.9999544326	0.9999545562	0.999954515	4.54025622609369E-05	4.54025603727281E-05	0	0	1	0	0	0	0	0	0	0.0005453666
